# Supplementary material
Source: PubMed Central journal article supplement (PMC4117357)
Supplement: NIHMS606485-supplement-01.pdf [file NIHMS606485-supplement-01.pdf]

## Supplementary Data

# Inhibition of apoptosis in human induced pluripotent stem cells during expansion in a defined culture using angiopoietin-1 derived peptide QHREDGS

*Dang, Lan T. H.<sup>1,2,5#</sup>, Feric, Nicole<sup>1#</sup>, Laschinger, Carol<sup>1</sup>, Chang, Wing Y.<sup>1,3</sup>, Zhang, Boyang<sup>6</sup>, Wood, Geoffrey A.<sup>4</sup>, Stanford, William L.<sup>1,3</sup>, and Radisic, Milica<sup>1,5,6\*</sup>*

1 – Institute of Biomaterials and Biomedical Engineering, University of Toronto, Toronto, Ontario, M5S 3G9, Canada

2 – Current Address: Toronto General Research Institute, University Health Network, Toronto, Ontario, M5G 1L7, Canada

3 – Sprott Centre for Stem Cell Research, The Ottawa Hospital Research Institute, Ottawa, Ontario, K1H 8L6, Canada; Department of Cellular & Molecular Medicine, University of Ottawa, Ottawa, Ontario, K1H 8M5, Canada

4 – Department of Pathobiology, University of Guelph, Guelph, Ontario, N1G 2W1, Canada

5 – The Heart and Stroke/Richard Lewar Centre of Excellence, University of Toronto, Toronto, Ontario, M5S 1A8, Canada

6 – Department of Chemical Engineering and Applied Chemistry, University of Toronto, Toronto, Ontario, M5S 3E5, Canada

# These authors contributed equally to this work.

\*Correspondence to be addressed to:

Milica Radisic, Ph.D., P.Eng.  
Institute of Biomaterials and Biomedical Engineering  
Heart and Stroke Richard Lewar Centre of Excellence  
Department of Chemical Engineering  
University of Toronto  
164 College St, RS 407  
Toronto, Ontario, M5S 3G9  
m.radisic@utoronto.ca  
Tel: 416- 946-5295/ Fax: 416-978-8605

**List of Antibodies:**

*FACS analysis:* Oct4 (Santa Cruz Biotechnology Inc., Santa Cruz, CA, cat# sc-5279), SSEA-4 (Developmental Studies Hybridoma Bank, Iowa City, IA, cat# MC-813-70) and all secondary antibodies (Jackson ImmunoResearch, West Grove, PA).

*Immunostaining on Feeder Layers:* SMA (Millipore, Temecula, CA, cat# CBL171), Gata6 (Santa Cruz Biotechnology Inc., sc-9055), and  $\beta$ -III Tubulin (Life Technologies, Burlington, ON, cat# 480011), BrdU (AbD Serotec, Raleigh, NC, cat# MCA2060), Ki67 (Millipore, cat#AB9260) and all secondary antibodies (Jackson ImmunoResearch).

*Immunostaining on Matrigel:* All secondary antibody (Dako Canada, Inc., Burlington, ON).

*Western blot:* ILK (Cell Signaling Technology Inc., Danvers, MA, cat# 3856), phospho-AKT (Ser 473) (Cell Signaling Technology Inc., cat# 4060), AKT (Cell Signaling Technology Inc., cat# 2920), phospho-ERK1/2 (Thr202/Tyr204) (Cell Signaling Technology Inc., cat# 4370), ERK1/2 (Cell Signaling Technology Inc., cat# 4695) and all secondary antibodies (Dako Canada, Inc.).

*Adhesion Assay:* CD29 ( $\beta_1$ -integrin) (BD Biosciences, Mississauga, CA, cat# MR2017).

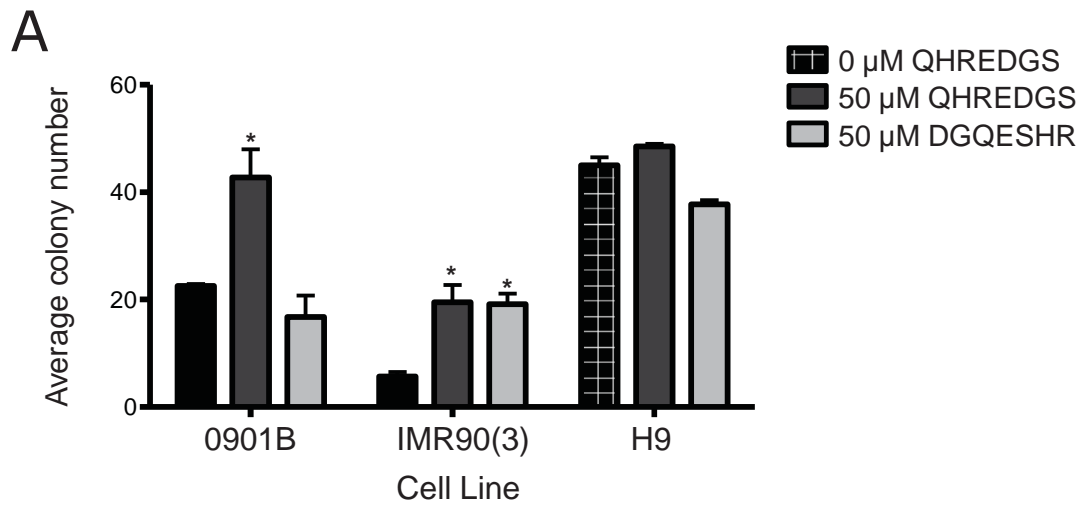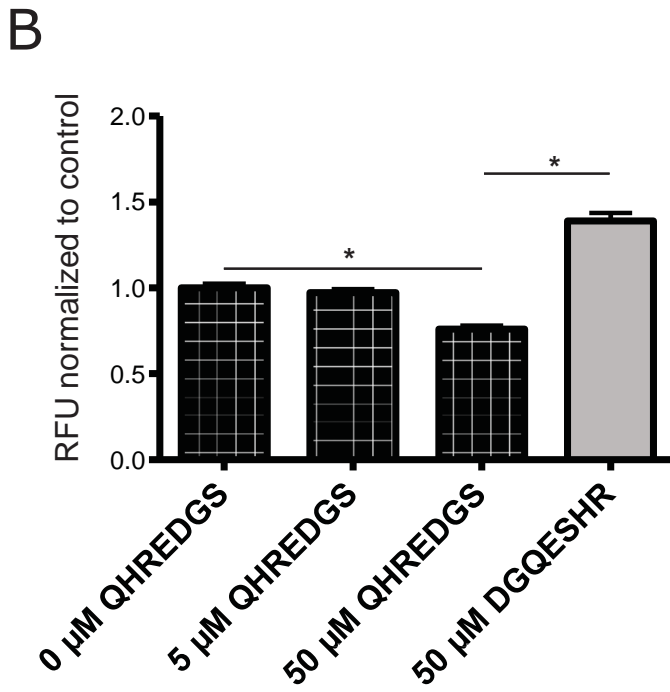

**A**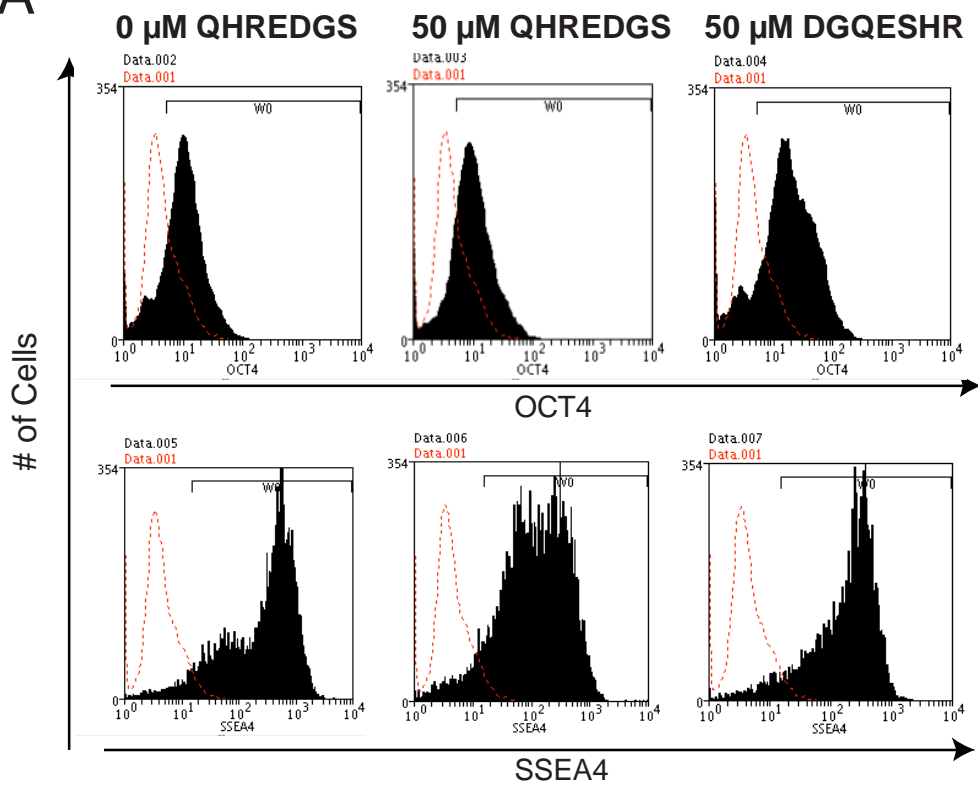**B**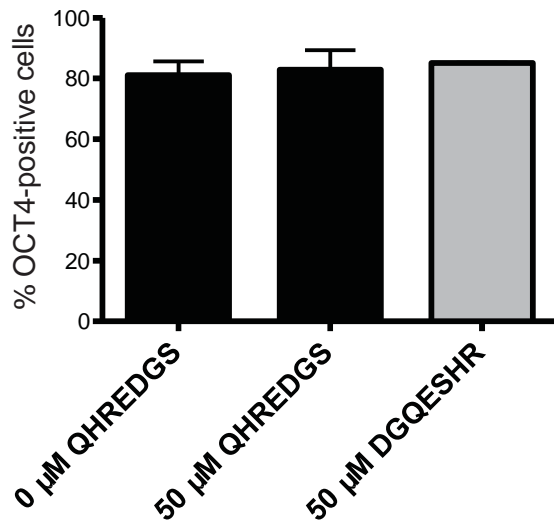**C**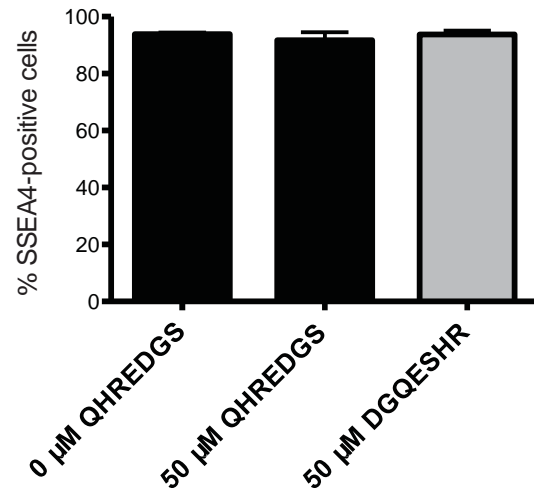

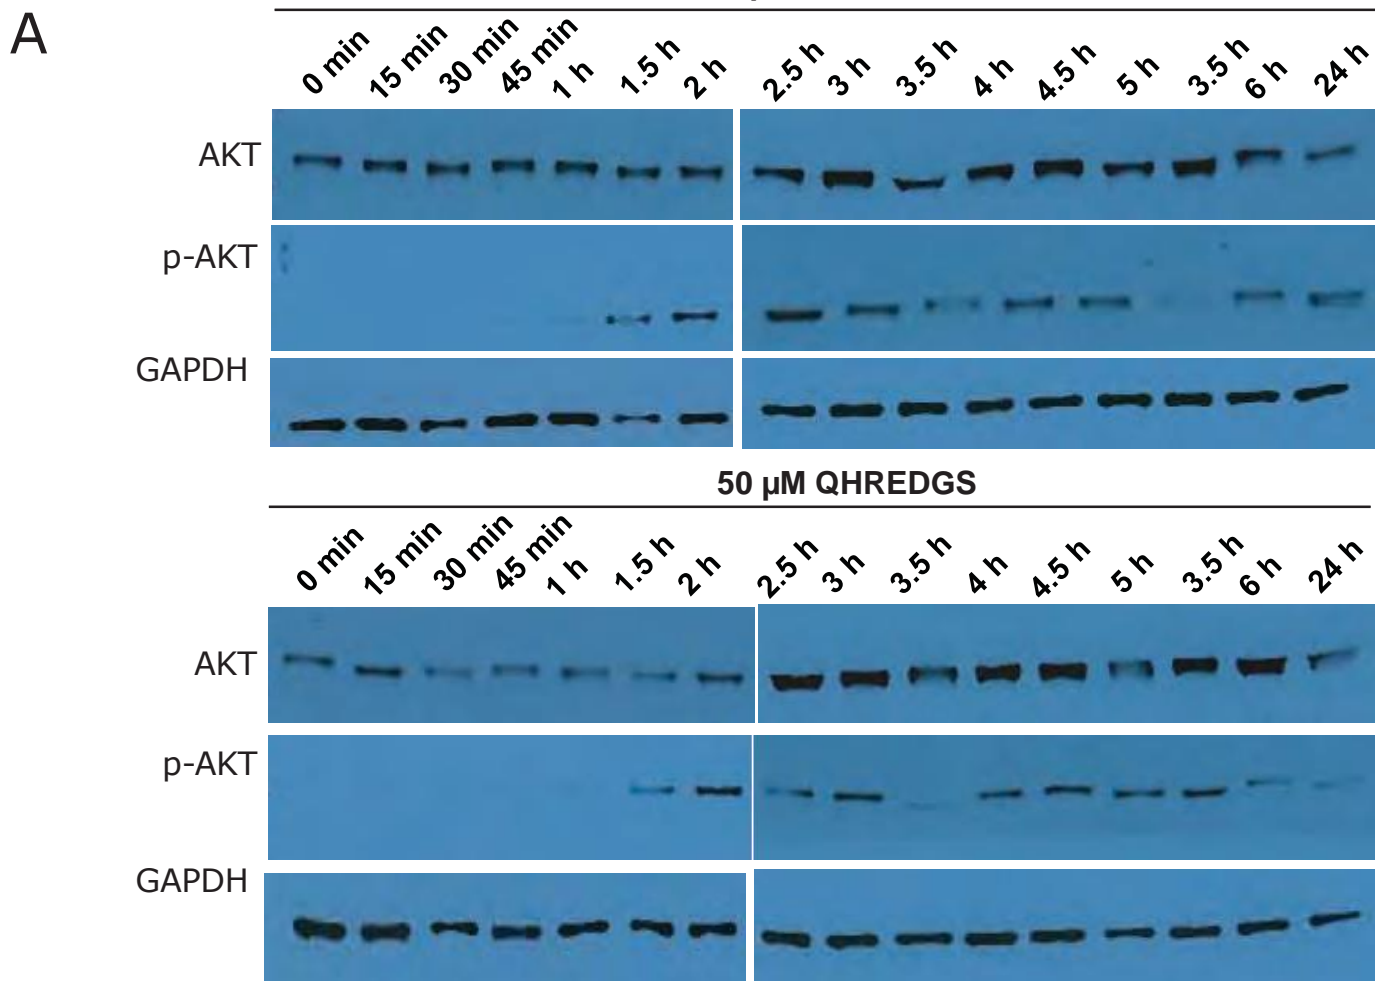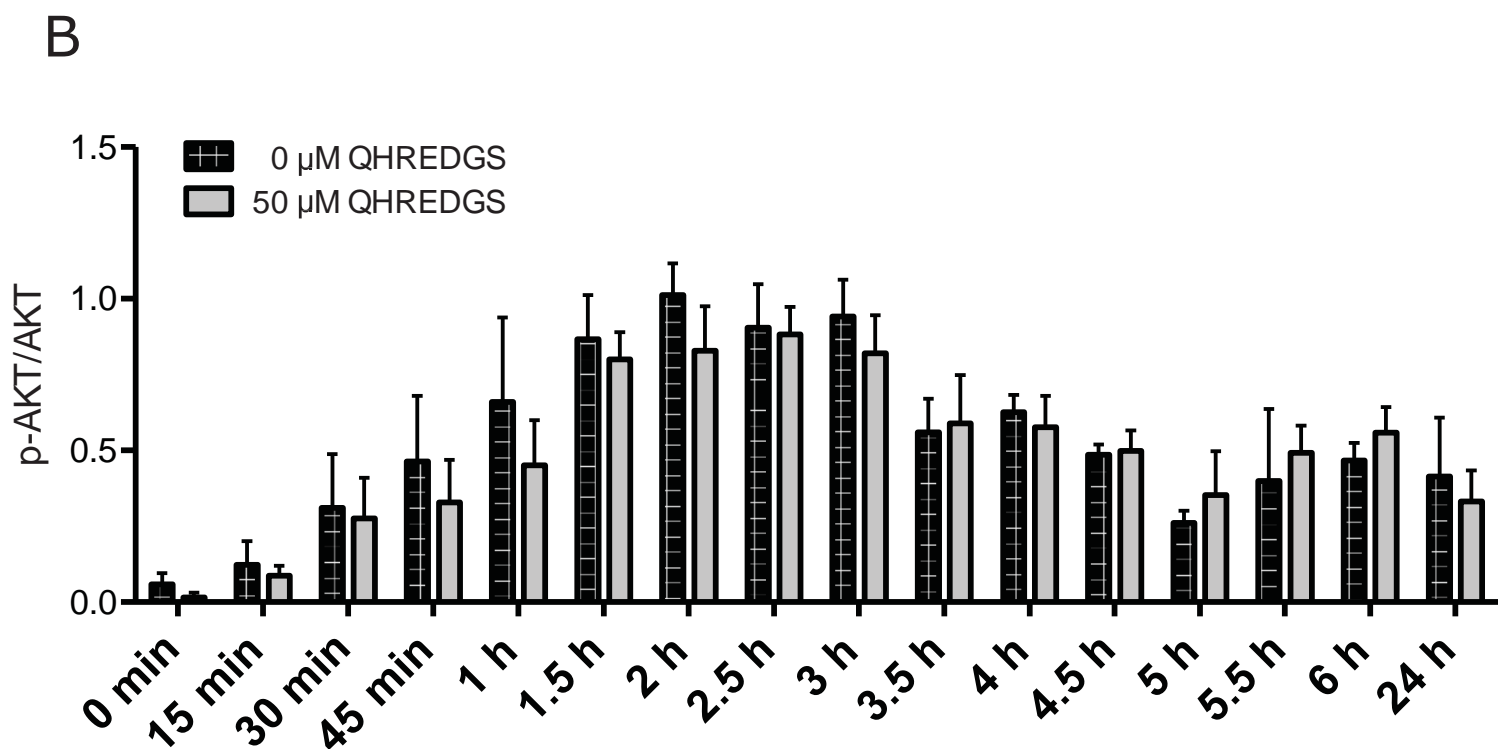

**Supplementary Figure 1: QHREDGS increases hiPSC colony number and downregulates caspase-3/7 activity during single-cell dissociation in serum-free, feeder layer culture conditions.** [A] Human iPSCs were pre-treated for 5 passages with PBS alone (0 $\mu$ M QHREDGS; black bars), 50 $\mu$ M QHREDGS (dark grey bars) or 50 $\mu$ M DGQESHR (light grey bars), dissociated to single cells and plated at a low density, then cultured for 7 days in the presence of the treatments. Colony number was determined for various PSC lines—0901B, IMR90(3) and H9—7 days after single-cell dissociation. [B] 0901B hiPSCs were pre-treated for 5 passages with PBS alone (0 $\mu$ M QHREDGS), an increasing concentration of QHREDGS peptide or the scrambled peptide DGQESHR, dissociated to single cells and plated at a low density, then cultured for 7 days in the presence of the treatments. The cells were then assayed for caspase-3/7 activity. The relative fluorescence units (RFU) per cell is indicative of caspase-3/7 activity. Data presented are the mean  $\pm$  SEM. *P* values are derived from Student's *t*-test, *P* < 0.05 considered significant (n=3).

**Supplementary Figure 2: QHREDGS treatment does not affect the pluripotency of 0901B hiPSCs *in vitro*.** [A-C] Flow cytometric analysis of PBS (0 $\mu$ M QHREDGS), 50 $\mu$ M QHREDGS and 50 $\mu$ M DGQESHR treated 0901B hiPSCs. [A] Representative Oct4 (top panels) and SSEA4 histograms (bottom panels). Red denotes secondary antibody only control and black denotes cell population positive for the designated antibody. [B-C] Quantification of Oct4+ [B] and SSEA4+ [C] cells. Data presented are the mean  $\pm$  SEM. *P* values are derived from Student's *t*-test, *P* < 0.05 considered significant (n=3).

**Supplementary Figure 3: QHREDGS does not affect activation of AKT.** [A-B] BJ1D hiPSCs were single-cell dissociated and seeded onto Matrigel in the presence of PBS (0 $\mu$ M QHREDGS) or 50 $\mu$ M soluble QHREDGS. At various time points, cells were scraped and lysed. Cell lysates were analyzed by Western blot analysis using the denoted antibodies and the resultant bands were quantified by densitometry. [A] Representative images of Western blot membranes probed with denoted antibodies. [B] Quantification of Western blot analysis. Data presented are the average normalized phospho-AKT (p-AKT) concentration determined from the p-AKT:AKT ratio  $\pm$  SEM (n=4).
